# Supplementary material for: Anti-Thermal Quenching in NdIII Molecular Near-Infrared Thermometers Operating at Physiological Temperatures
Source: Research Square preprint supplement (doi:10.21203/rs.3.rs-5795718/v1), 2025-01-15

## checkCIF/PLATON report

Structure factors have been supplied for datablock(s) SCD22\_118\_Fddd\_sq

THIS REPORT IS FOR GUIDANCE ONLY. IF USED AS PART OF A REVIEW PROCEDURE FOR PUBLICATION, IT SHOULD NOT REPLACE THE EXPERTISE OF AN EXPERIENCED CRYSTALLOGRAPHIC REFEREE.

No syntax errors found.      CIF dictionary      Interpreting this report

### Datablock: SCD22\_118\_Fddd\_sq

---

Bond precision:    C-C = 0.0149 A                      Wavelength=0.71073

Cell:                      a=13.9439 (6)              b=30.2750 (15)              c=31.0542 (15)  
                                    alpha=90                      beta=90                      gamma=90

Temperature:              296 K

|                        | Calculated                         | Reported                                   |
|------------------------|------------------------------------|--------------------------------------------|
| Volume                 | 13109.6(11)                        | 13109.6(11)                                |
| Space group            | F d d d                            | F d d d                                    |
| Hall group             | -F 2uv 2vw                         | -F 2uv 2vw                                 |
| Moiety formula         | C44 H40 N14 Nd2 O10 [+<br>solvent] | C44 H40 N14 Nd2 O10<br>[+ANIONS + solvent] |
| Sum formula            | C44 H40 N14 Nd2 O10 [+<br>solvent] | C44 H40 N14 Nd2 O10<br>[+ANIONS + solvent] |
| Mr                     | 1213.38                            | 1213.38                                    |
| Dx, g cm <sup>-3</sup> | 1.230                              | 1.230                                      |
| Z                      | 8                                  | 8                                          |
| Mu (mm <sup>-1</sup> ) | 1.619                              | 1.619                                      |
| F000                   | 4816.0                             | 4816.0                                     |
| F000'                  | 4814.56                            |                                            |
| h, k, lmax             | 17, 37, 38                         | 17, 37, 38                                 |
| Nref                   | 3236                               | 3205                                       |
| Tmin, Tmax             | 0.947, 0.960                       | 0.452, 0.499                               |
| Tmin'                  | 0.930                              |                                            |

Correction method= # Reported T Limits: Tmin=0.452 Tmax=0.499  
AbsCorr = EMPIRICAL

Data completeness= 0.990

Theta(max)= 26.000

R(reflections)= 0.0994( 1868)

wR2(reflections)=  
0.3252( 3205)

S = 1.148

Npar= 161

The following ALERTS were generated. Each ALERT has the format

**test-name\_ALERT\_alert-type\_alert-level.**

Click on the hyperlinks for more details of the test.

---

**Alert level B**

|                   |                           |     |      |   |           |
|-------------------|---------------------------|-----|------|---|-----------|
| PLAT232_ALERT_2_B | Hirshfeld Test Diff (M-X) | Nd1 | --O1 | . | 10.3 s.u. |
| PLAT232_ALERT_2_B | Hirshfeld Test Diff (M-X) | Nd1 | --N1 | . | 11.2 s.u. |
| PLAT232_ALERT_2_B | Hirshfeld Test Diff (M-X) | Nd1 | --N3 | . | 11.0 s.u. |

---

**Alert level C**

|                   |                                                |         |          |     |                |
|-------------------|------------------------------------------------|---------|----------|-----|----------------|
| PLAT084_ALERT_3_C | High wR2 Value (i.e. > 0.25)                   |         |          |     | 0.33 Report    |
| PLAT230_ALERT_2_C | Hirshfeld Test Diff for                        | O3      | --N4     | .   | 5.1 s.u.       |
| PLAT234_ALERT_4_C | Large Hirshfeld Difference                     | O2      | --N4     | .   | 0.18 Ang.      |
| PLAT241_ALERT_2_C | High 'MainMol' Ueq as Compared to Neighbors of |         |          | Nd1 | Check          |
| PLAT242_ALERT_2_C | Low 'MainMol' Ueq as Compared to Neighbors of  |         |          | O2  | Check          |
| PLAT242_ALERT_2_C | Low 'MainMol' Ueq as Compared to Neighbors of  |         |          | N1  | Check          |
| PLAT242_ALERT_2_C | Low 'MainMol' Ueq as Compared to Neighbors of  |         |          | N2  | Check          |
| PLAT242_ALERT_2_C | Low 'MainMol' Ueq as Compared to Neighbors of  |         |          | N3  | Check          |
| PLAT342_ALERT_3_C | Low Bond Precision on C-C Bonds                |         |          |     | 0.01491 Ang.   |
| PLAT369_ALERT_2_C | Long C(sp2)-C(sp2) Bond                        | C10     | - C11    | .   | 1.53 Ang.      |
| PLAT790_ALERT_4_C | Centre of Gravity not Within Unit Cell: Resd.  | #       |          |     | 1 Note         |
|                   | C44 H40 N14 Nd2 O10                            |         |          |     |                |
| PLAT905_ALERT_3_C | Negative K value in the Analysis of Variance   |         |          |     | -10.256 Report |
| PLAT905_ALERT_3_C | Negative K value in the Analysis of Variance   |         |          |     | -0.194 Report  |
| PLAT911_ALERT_3_C | Missing FCF Refl Between Thmin & STh/L=        | 0.600   |          |     | 30 Report      |
| PLAT918_ALERT_3_C | Reflection(s) with I(obs) much Smaller I(calc) |         |          |     | 4 Check        |
| PLAT971_ALERT_2_C | Check Calcd Resid. Dens.                       | 0.07Ang | From C11 |     | 1.55 eA-3      |

---

**Alert level G**

CELLZ01\_ALERT\_1\_G Difference between formula and atom\_site contents detected.

CELLZ01\_ALERT\_1\_G ALERT: Large difference may be due to a

symmetry error - see SYMMG tests

From the CIF: \_cell\_formula\_units\_Z 8

From the CIF: \_chemical\_formula\_sum C44 H40 N14 Nd2 O10 [+anions + sol

TEST: Compare cell contents of formula and atom\_site data

| atom  | Z*formula | cif sites | diff |
|-------|-----------|-----------|------|
| C     | 352.00    | 352.00    | 0.00 |
| H     | 320.00    | 320.00    | 0.00 |
| N     | 112.00    | 112.00    | 0.00 |
| Nd    | 16.00     | 16.00     | 0.00 |
| O     | 80.00     | 80.00     | 0.00 |
| [+ani | 8.00      | 0.00      | 8.00 |
| +     | 8.00      | 0.00      | 8.00 |
| solve | 8.00      | 0.00      | 8.00 |

|                   |                                         |     |      |   |          |
|-------------------|-----------------------------------------|-----|------|---|----------|
| PLAT232_ALERT_2_G | Hirshfeld Test Diff (M-X)               | Nd1 | --O2 | . | 7.2 s.u. |
| PLAT232_ALERT_2_G | Hirshfeld Test Diff (M-X)               | Nd1 | --N2 | . | 9.0 s.u. |
| PLAT606_ALERT_4_G | Solvent Accessible VOID(S) in Structure |     |      |   | ! Info   |

|                   |                                                  |      |        |
|-------------------|--------------------------------------------------|------|--------|
| PLAT869_ALERT_4_G | ALERTS Related to the Use of SQUEEZE Suppressed  | !    | Info   |
| PLAT910_ALERT_3_G | Missing # of FCF Reflection(s) Below Theta(Min). | 1    | Note   |
| PLAT933_ALERT_2_G | Number of HKL-OMIT Records in Embedded .res File | 31   | Note   |
| PLAT967_ALERT_5_G | Note: Two-Theta Cutoff Value in Embedded .res .. | 52.0 | Degree |
| PLAT978_ALERT_2_G | Number C-C Bonds with Positive Residual Density. | 1    | Info   |

---

0 **ALERT level A** = Most likely a serious problem - resolve or explain  
3 **ALERT level B** = A potentially serious problem, consider carefully  
16 **ALERT level C** = Check. Ensure it is not caused by an omission or oversight  
10 **ALERT level G** = General information/check it is not something unexpected

2 ALERT type 1 CIF construction/syntax error, inconsistent or missing data  
15 ALERT type 2 Indicator that the structure model may be wrong or deficient  
7 ALERT type 3 Indicator that the structure quality may be low  
4 ALERT type 4 Improvement, methodology, query or suggestion  
1 ALERT type 5 Informative message, check

---

It is advisable to attempt to resolve as many as possible of the alerts in all categories. Often the minor alerts point to easily fixed oversights, errors and omissions in your CIF or refinement strategy, so attention to these fine details can be worthwhile. In order to resolve some of the more serious problems it may be necessary to carry out additional measurements or structure refinements. However, the purpose of your study may justify the reported deviations and the more serious of these should normally be commented upon in the discussion or experimental section of a paper or in the "special\_details" fields of the CIF. checkCIF was carefully designed to identify outliers and unusual parameters, but every test has its limitations and alerts that are not important in a particular case may appear. Conversely, the absence of alerts does not guarantee there are no aspects of the results needing attention. It is up to the individual to critically assess their own results and, if necessary, seek expert advice.

### Publication of your CIF in IUCr journals

A basic structural check has been run on your CIF. These basic checks will be run on all CIFs submitted for publication in IUCr journals (*Acta Crystallographica*, *Journal of Applied Crystallography*, *Journal of Synchrotron Radiation*); however, if you intend to submit to *Acta Crystallographica Section C* or *E* or *IUCrData*, you should make sure that full publication checks are run on the final version of your CIF prior to submission.

### Publication of your CIF in other journals

Please refer to the *Notes for Authors* of the relevant journal for any special instructions relating to CIF submission.

---

**PLATON version of 12/09/2022; check.def file version of 09/08/2022**

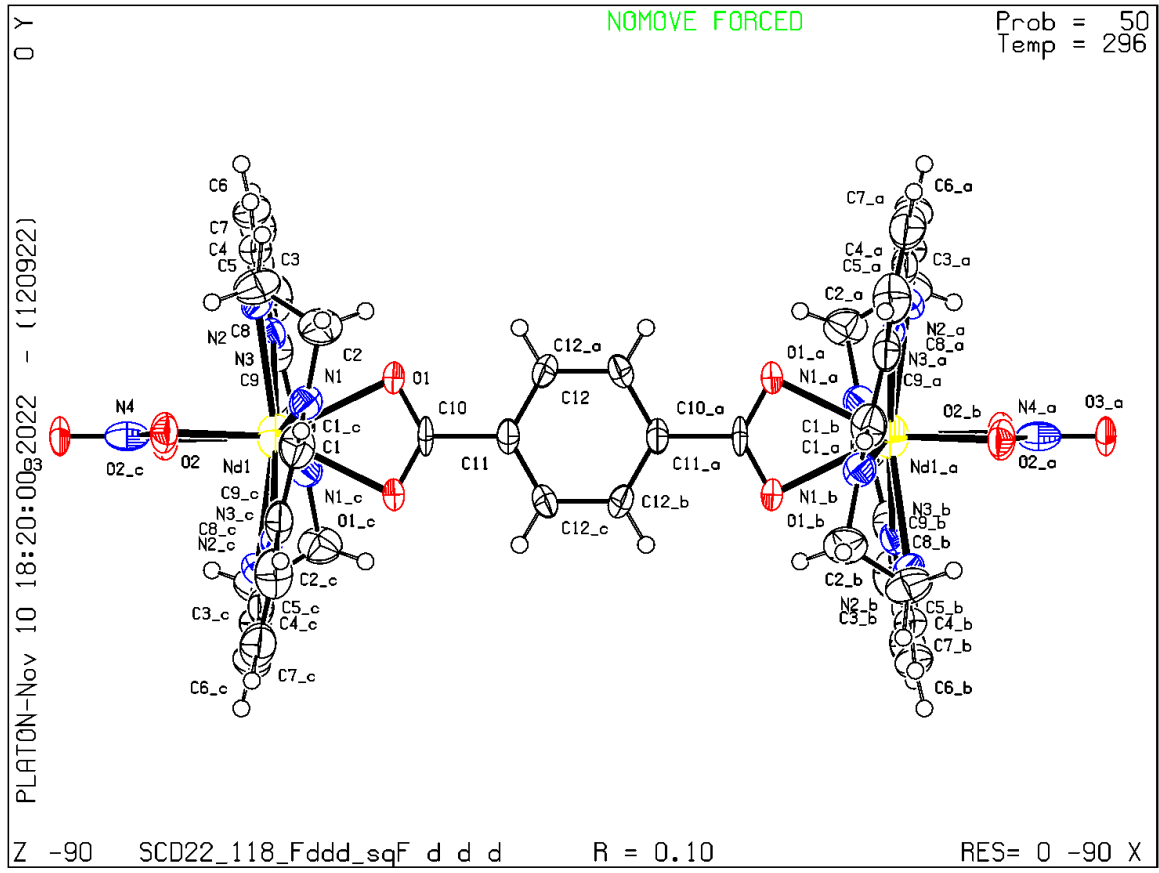

Supplement: Supplementary file 4 [file b0860477d2e11b661580534c.pdf]
