# Supplementary material for: Anti-Thermal Quenching in NdIII Molecular Near-Infrared Thermometers Operating at Physiological Temperatures
Source: Research Square preprint supplement (doi:10.21203/rs.3.rs-5795718/v1), 2025-01-15
Supplement: Supplementary file 2 [file 83907701c4588828858e7bc3.docx]

Anti-Thermal Quenching in NdIII Molecular Near-Infrared Thermometers Operating at Physiological Temperatures

María José Maldonado,[a] Patricia Farías-Carreño,[a] Yolimar Gil,[a] Andrés Vega,[b] Ricardo Costa de Santana,[c] Daniel Aravena,[d]* Carlos D. S. Brites,[e] Luís D. Carlos,[e] Albano N. Carneiro Neto,[e]* Fiorenzo Vetrone,[f] Pablo Fuentealba*[a]

[a] MSc. M.J. Maldonado, P. Farías-Carreño, Dr. Y. Gil, Prof. P Fuentealba
Facultad de Ciencias Químicas y Farmacéuticas
Universidad de Chile
Olivos 1007, 8380544, Santiago, Chile
E-mail: pfuentealbacastro@ciq.uchile.cl

[b] Prof. A. Vega
Departamento de Ciencias Químicas
Universidad Andrés Bello
Av. República 275, 8370011, Santiago, Chile

[c] Prof. R. C. Santana
Instituto de Física
Universidade Federal de Goiás
Campus Samambaia, 74690-900, Goiânia (GO), Brazil

[d] Prof. Daniel Aravena
Departamento de Materiales, Facultad de Química y Biología
Universidad de Santiago

Santiago 9160000, Chile

E-mail: daniel.aravena.p@usach.cl

[e] Prof. L. D. Carlos, Prof. C. D. S. Brites, Dr. A. N. Carneiro Neto

Phantom-g, CICECO–Aveiro Institute of Materials, Physics Department

University of Aveiro, 3810-193, Aveiro, Portugall

E-mail: albanoneto@ua.pt

[f] Prof. F. Vetrone
Institut National de la Recherche Scientifique, Centre Énergie, Matériaux et Télécommunications
Université du Québec
Varennes (Montréal), Québec, Canada, J3X 1P7

**Contents**

[1. SYNTHESIS OF THE COMPOUNDS 2](#_Toc187308118)

[2. CHARACTERIZATION 3](#_Toc187308119)

[2.1. Crystallographic details 3](#_Toc187308120)

[Figure S1 3](#_Toc187308121)

[Figure S2 3](#_Toc187308122)

[Table S1 4](#_Toc187308123)

[Table S2 4](#_Toc187308124)

[Table S3 7](#_Toc187308125)

[Table S4 7](#_Toc187308126)

[Table S5 7](#_Toc187308127)

[2.2. Other characterizations 7](#_Toc187308128)

[Figure S3 8](#_Toc187308129)

[Figure S4 8](#_Toc187308130)

[Figure S5 9](#_Toc187308131)

[Table S6 9](#_Toc187308132)

[3. THERMOMETRIC PROPERTIES 10](#_Toc187308133)

[Figure S6 10](#_Toc187308134)

[Table S7 10](#_Toc187308135)

[Table S8 11](#_Toc187308136)

[Table S9 11](#_Toc187308137)

[Table S10 12](#_Toc187308138)

[Figure S7 12](#_Toc187308139)

[Figure S8 13](#_Toc187308140)

[4. THEORETICAL CALCULATIONS 14](#_Toc187308141)

[Figure S9 14](#_Toc187308142)

[Figure S10 15](#_Toc187308143)

[REFERENCES 16](#_Toc187308144)

# 1. SYNTHESIS OF THE COMPOUNDS

[Nd(L)(NO3)3] **(1):** The synthesis of the mononuclear complex was performed following procedures described in the literature [1–4], using the well-known template reaction of 2,6-pyridinedicarbaldehide with ethylenediamine in the presence of neodymium(III) nitrate (Nd(NO3)3·6H2O). In this procedure, to a solution of 1 mmol of the dialdehyde in 7.5 mL of ethanol/acetonitrile (1:1), a solution of 0.5 mmol of neodymium(III) nitrate in 7.5 mL of the same solvent mixture was added. Subsequently, 1 mmol of ethylenediamine was added directly to the reaction solution, which was stirred for 3 h at room temperature. The formed solid was filtered and washed with the same solvent mixture and dried under vacuum. Rhombic shape single crystals, suitable for X-ray diffraction, were obtained after 2 weeks by slow evaporation of the filtered solution. Yield: 64.8%. %exp(calc): C = 31.9 (33.3) N = 18.5 (19.4) H = 3.0 (2.8). IR (cm−1): 1652 (C=N) imine. 1558 (C=N) pyridine; 1450, 1300 and 1030 (bidentate NO3− )

[(Nd(L))2(µ-BDC)(NO3)2](NO3)2·H2O **(2)**: For the synthesis of the dimeric unit, the obtained mononuclear complex **(1)** was reacted with 1,4-benzene dicarboxylic acid (H2BDC), using the following procedure. An aqueous solution of 0.5 mmol of **(1)** in 4 mL nanopure water was mixed with an aqueous solution of 0.5 mmol of H2BDC with 1 mmol triethylamine in 4 mL of the same solvent. The reaction mixture was refluxed for 3 h. The obtained solid was filtered, washed with nanopure water, and dried under vacuum. From the residual solution, single crystals with orthorhombic shape were formed within a week. Yield: 42.5 %. % exp(calc): C = 41.3 (43.1) N = 13.3 (13.5) H = 3.9 (3.6). IR (cm−1): 1657 (C=N) imine. 1559 (C=N) pyridine; 1533-1506 (C=O) carboxilate; 1450, 1300 and 1030 (bidentate NO3− ); 1383 ionic nitrate; 835 (C-H) *p-*substituted benzene ring.

[(Nd(L))(µ-BTC)(H2O)]6·35H2O **(3)**: For the synthesis of the hexameric unit, a similar procedure was follow as described above; but instead of H2BDC, 1,3,5-bencenetricarbolxilic acid (H3BTC) was added as the bridging ligand. Yield: 7.7%. %exp(calc): C = 40.4 (40.9) N = 10.8 (10.6) H = 4.3 (4.4). IR (cm−1): 1657 (C=N) imine. 1607 (C=N) pyridine; 1550-1537 (C=O) carboxilate; 760 (C-H) 1,3,5*-*substituted benzene ring.

# 2. CHARACTERIZATION

## 2.1. Crystallographic details


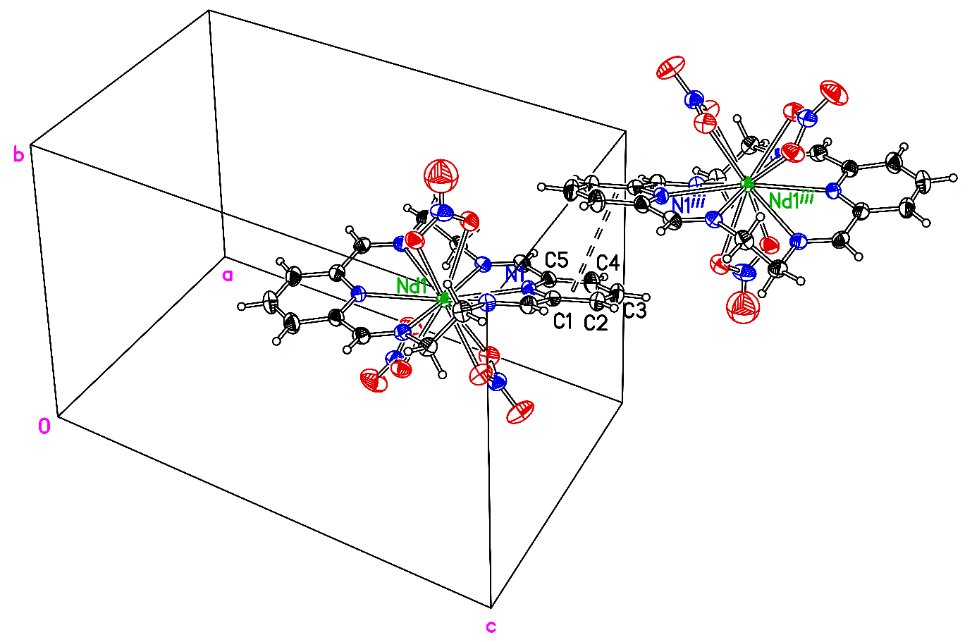


Figure S1. Stack interactions in the packing structure of **1**. ***Symmetry label:*** *iii*: *1.5 - x, 1.5 - y, 2 – z.*

Figure S2. Schematic representation of the first coordination sphere of **1Nd** (a), **2Nd** (b), and the repetitive unit of **6Nd** (c).

Table S1. Crystal data and structure refinement details for 1Nd, 2Nd, and 6Nd.

|  | **1Nd** | **2Nd** | **6Nd** |
| --- | --- | --- | --- |
| **CSD Deposit Code** | CCDC2284360 | CCDC2284362 | CCDC2295992 |
| **FW/uma** | 648.65 | 1213.38 [+anions +solvent] | 4126.53 [+ solvent] |
| **Formula** | C18H18N9NdO9 | C44H40N14Nd2O10[+anions +solvent] | C162H138N36Nd6O42[+solvent] |
| **T / K** | 296 | | |
| **Crystal System** | Monoclinic | Orthorhombic | Trigonal |
| **Space Group** | *C*2/*c* | *Fddd* | *R*:*H* |
| **a (Å)** | 13.0256(4) | 13.9439(6) | 31.8437(6) |
| **b (Å)** | 9.8574(4) | 30.2750(15) | 31.8437(6) |
| **c (Å)** | 18.6057(8) | 31.0542(15) | 19.8704(9) |
| **** | 90 | | |
| **** | 109.180(2) | 90 | |
| **** | 90 | | 120 |
| **V (Å 3)** | 2256.34(15) | 13109.6 (11) | 17449.5(10) |
| **Z(Z’)** | 4(8) | 8(32) | 3(18) |
| **d (g cm-3)** | 1.909 | 1.230 | 1.178 |
| ** (mm-1)** | 2.37 | 1.62 | 1.38 |
| **F(000)** | 1284 | 4816 | 6174 |
| **range** | 2.3° to 26.0° | 1.9° to 26.0° | 1.3° to 26.0° |
| **hkl range** | -16 ≤ h ≤ 16 | -17 ≤ h ≤ 17 | -39 ≤ h ≤ 19 |
| -12 ≤ k ≤ 12 | -37 ≤ k ≤ 37 | -38 ≤ k ≤ 39 |
| -22 ≤ l ≤ 22 | -38 ≤ l ≤ 38 | -24 ≤ l ≤ 24 |
| **Ntot, Nuniq (Rint), Nobs** | 8392, 2206(0.026), 2081 | 24530, 3205(0.104), 1868 | 20702, 5911(0.029), 4852 |
| **Ref. Parameters** | 169 | 161 | 378 |
| **GOF** | 1.10 | 1.15 | 1.09 |
| **R1, wR2 (obs)** | 0.021, 0.049 | 0.099, 0.325 | 0.039, 0.111 |
| **Max. and min** ** e Å-3** | 0.93, -0.73 | 1.52, -0.84 | 0.61, -0.75 |

Table S2. Selected bond distances and angles for **1Nd**, **2Nd**, and **6Nd**.

| **1Nd** | | | |
| --- | --- | --- | --- |
| Nd1—O4i | 2.622(2) | Nd1—N1i | 2.691(2) |
| Nd1—O4 | 2.622(2) | Nd1—N1 | 2.691(2) |
| Nd1—N2i | 2.659(2) | Nd1—O2i | 2.694(2) |
| Nd1—N2 | 2.659(2) | Nd1—O2 | 2.694(2) |
| Nd1—O1 | 2.660(2) | Nd1—N3 | 2.712(2) |
| Nd1—O1i | 2.660(2) | Nd1—N3i | 2.712(2) |
|  |  |  |  |
| O4i—Nd1—O4 | 48.42(8) | O1i—Nd1—O2i | 47.15(6) |
| O4i—Nd1—N2i | 66.17(6) | N1i—Nd1—O2i | 117.74(7) |
| O4—Nd1—N2i | 110.33(6) | N1—Nd1—O2i | 71.29(7) |
| O4i—Nd1—N2 | 110.33(6) | O4i—Nd1—O2 | 128.76(7) |
| O4—Nd1—N2 | 66.17(6) | O4—Nd1—O2 | 125.10(6) |
| N2i—Nd1—N2 | 176.44(9) | N2i—Nd1—O2 | 112.16(7) |
| O4i—Nd1—O1 | 123.90(6) | N2—Nd1—O2 | 70.35(6) |
| O4—Nd1—O1 | 165.98(6) | O1—Nd1—O2 | 47.15(6) |
| N2i—Nd1—O1 | 69.54(6) | O1i—Nd1—O2 | 64.98(7) |
| N2—Nd1—O1 | 113.68(6) | N1i—Nd1—O2 | 71.29(7) |
| O4i—Nd1—O1i | 165.98(6) | N1—Nd1—O2 | 117.74(7) |
| O4—Nd1—O1i | 123.90(6) | O2i—Nd1—O2 | 97.64(9) |
| N2i—Nd1—O1i | 113.68(6) | O4i—Nd1—N3 | 68.82(7) |
| N2—Nd1—O1i | 69.54(6) | O4—Nd1—N3 | 73.85(7) |
| O1—Nd1—O1i | 66.21(9) | N2i—Nd1—N3 | 61.60(7) |
| O4i—Nd1—N1i | 64.66(6) | N2—Nd1—N3 | 116.99(7) |
| O4—Nd1—N1i | 103.16(6) | O1—Nd1—N3 | 116.18(6) |
| N2i—Nd1—N1i | 60.00(7) | O1i—Nd1—N3 | 98.41(6) |
| N2—Nd1—N1i | 119.55(7) | N1i—Nd1—N3 | 115.48(7) |
| O1—Nd1—N1i | 64.15(7) | N1—Nd1—N3 | 59.52(7) |
| O1i—Nd1—N1i | 128.31(7) | O2i—Nd1—N3 | 61.72(7) |
| O4i—Nd1—N1 | 103.16(7) | O2—Nd1—N3 | 159.31(7) |
| O4—Nd1—N1 | 64.66(7) | O4i—Nd1—N3i | 73.85(7) |
| N2i—Nd1—N1 | 119.55(7) | O4—Nd1—N3i | 68.82(7) |
| N2—Nd1—N1 | 60.00(7) | N2i—Nd1—N3i | 116.99(7) |
| O1—Nd1—N1 | 128.31(7) | N2—Nd1—N3i | 61.60(7) |
| O1i—Nd1—N1 | 64.15(7) | O1—Nd1—N3i | 98.41(6) |
| N1i—Nd1—N1 | 167.39(9) | O1i—Nd1—N3i | 116.18(6) |
| O4i—Nd1—O2i | 125.10(6) | N1i—Nd1—N3i | 59.52(7) |
| O4—Nd1—O2i | 128.76(7) | N1—Nd1—N3i | 115.48(7) |
| N2i—Nd1—O2i | 70.35(6) | O2i—Nd1—N3i | 159.31(7) |
| N2—Nd1—O2i | 112.16(7) | O2—Nd1—N3i | 61.72(7) |
| O1—Nd1—O2i | 64.98(7) | N3—Nd1—N3i | 138.95(10) |
| Symmetry code*: i:* -*x*+1, *y*, -*z*+3/2. | | | |
| **2Nd** | | | |
| Nd1—O2 | 2.328(6) | Nd1—N1ii | 2.583(7) |
| Nd1—O2ii | 2.328(6) | Nd1—N2 | 2.598(7) |
| Nd1—O1 | 2.444(5) | Nd1—N2ii | 2.598(7) |
| Nd1—O1ii | 2.444(5) | Nd1—N3ii | 2.652(7) |
| Nd1—N1 | 2.583(7) | Nd1—N3 | 2.652(7) |
|  |  |  |  |
| O2—Nd1—O2ii | 55.3(4) | O1—Nd1—N2ii | 121.6(2) |
| O2—Nd1—O1 | 143.4(2) | O1ii—Nd1—N2ii | 73.1(2) |
| O2ii—Nd1—O1 | 141.6(2) | N1—Nd1—N2ii | 121.7(2) |
| O2—Nd1—O1ii | 141.6(2) | N1ii—Nd1—N2ii | 62.0(2) |
| O2ii—Nd1—O1ii | 143.4(2) | N2—Nd1—N2ii | 165.0(3) |
| O1—Nd1—O1ii | 52.9(3) | O2—Nd1—N3ii | 71.5(2) |
| O2—Nd1—N1 | 75.4(2) | O2ii—Nd1—N3ii | 106.7(2) |
| O2ii—Nd1—N1 | 129.7(2) | O1—Nd1—N3ii | 111.43(19) |
| O1—Nd1—N1 | 75.1(2) | O1ii—Nd1—N3ii | 70.35(18) |
| O1ii—Nd1—N1 | 82.3(2) | N1—Nd1—N3ii | 61.2(2) |
| O2—Nd1—N1ii | 129.7(2) | N1ii—Nd1—N3ii | 119.3(2) |
| O2ii—Nd1—N1ii | 75.5(2) | N2—Nd1—N3ii | 118.8(2) |
| O1—Nd1—N1ii | 82.3(2) | N2ii—Nd1—N3ii | 60.9(2) |
| O1ii—Nd1—N1ii | 75.1(2) | O2—Nd1—N3 | 106.7(2) |
| N1—Nd1—N1ii | 154.7(3) | O2ii—Nd1—N3 | 71.5(2) |
| O2—Nd1—N2 | 74.1(2) | O1—Nd1—N3 | 70.35(18) |
| O2ii—Nd1—N2 | 92.4(2) | O1ii—Nd1—N3 | 111.43(19) |
| O1—Nd1—N2 | 73.1(2) | N1—Nd1—N3 | 119.3(2) |
| O1ii—Nd1—N2 | 121.6(2) | N1ii—Nd1—N3 | 61.2(2) |
| N1—Nd1—N2 | 62.0(2) | N2—Nd1—N3 | 60.9(2) |
| N1ii—Nd1—N2 | 121.7(2) | N2ii—Nd1—N3 | 118.8(2) |
| O2—Nd1—N2ii | 92.4(2) | N3ii—Nd1—N3 | 178.1(2) |
| O2ii—Nd1—N2ii | 74.1(2) |  |  |
| Symmetry code*: ii:* -*x*-1/4, -*y*+3/4, *z*. | | | |
| **6Nd** | | | |
| Nd1—O6i | 2.369(3) | Nd1—N5 | 2.650(5) |
| Nd1—O7 | 2.522(4) | Nd1—N3 | 2.658(5) |
| Nd1—O1 | 2.558(3) | Nd1—N1 | 2.665(6) |
| Nd1—O2 | 2.592(4) | Nd1—N6 | 2.673(5) |
| Nd1—N2 | 2.617(5) | Nd1—N4 | 2.697(5) |
|  |  |  |  |
| O6i—Nd1—O7 | 66.93(12) | O1—Nd1—N1 | 99.68(15) |
| O6i—Nd1—O1 | 140.74(13) | O2—Nd1—N1 | 69.97(15) |
| O7—Nd1—O1 | 138.46(14) | N2—Nd1—N1 | 61.0(2) |
| O6i—Nd1—O2 | 138.65(13) | N5—Nd1—N1 | 120.33(19) |
| O7—Nd1—O2 | 138.13(15) | N3—Nd1—N1 | 118.0(2) |
| O1—Nd1—O2 | 50.40(12) | O6i—Nd1—N6 | 130.09(14) |
| O6i—Nd1—N2 | 81.01(15) | O7—Nd1—N6 | 68.66(14) |
| O7—Nd1—N2 | 90.51(17) | O1—Nd1—N6 | 71.01(15) |
| O1—Nd1—N2 | 119.06(14) | O2—Nd1—N6 | 90.49(16) |
| O2—Nd1—N2 | 69.11(14) | N2—Nd1—N6 | 121.1(2) |
| O6i—Nd1—N5 | 88.25(13) | N5—Nd1—N6 | 61.94(18) |
| O7—Nd1—N5 | 79.25(16) | N3—Nd1—N6 | 155.93(15) |
| O1—Nd1—N5 | 73.44(13) | N1—Nd1—N6 | 60.1(2) |
| O2—Nd1—N5 | 123.43(13) | O6i—Nd1—N4 | 68.92(13) |
| N2—Nd1—N5 | 167.46(15) | O7—Nd1—N4 | 119.32(15) |
| O6i—Nd1—N3 | 73.15(13) | O1—Nd1—N4 | 71.86(14) |
| O7—Nd1—N3 | 134.80(14) | O2—Nd1—N4 | 102.42(14) |
| O1—Nd1—N3 | 86.48(14) | N2—Nd1—N4 | 121.00(18) |
| O2—Nd1—N3 | 67.99(16) | N5—Nd1—N4 | 59.84(16) |
| N2—Nd1—N3 | 62.51(19) | N3—Nd1—N4 | 60.68(17) |
| N5—Nd1—N3 | 120.47(18) | N1—Nd1—N4 | 171.34(14) |
| O6i—Nd1—N1 | 119.45(14) | N6—Nd1—N4 | 117.16(17) |
| O7—Nd1—N1 | 68.17(15) |  |  |
| Symmetry code: *i:* y+1/3, -x+y+2/3, -z+5/3. | | | |

Table S3. Continuous Shape Measurement Calculations (CShM) of the first coordination sphere of NdIII in 1Nd, referring to all standard 12 vertices of the polyhedron. The lowest CShM value is highlighted in bold.

| Structure [ML12] | 1Nd |
| --- | --- |
| Dodecagon | 36.955 |
| Hendecagonal pyramid | 28.839 |
| Decagonal bipyramid | 16.466 |
| Hexagonal prism | 12.932 |
| Hexagonal antiprism | 16.205 |
| Truncated tetrahedron | 12.882 |
| Cuboctahedron | 6.231 |
| Anticuboctahedron J27 | 5.227 |
| Icosahedron | **2.054** |
| Johnson square cupola J4 | 21.900 |
| Johnson elongated pentagonal bipyramid J16 | 2.944 |
| Biaugmented pentagonal prism J53 | 15.421 |
| Sphenomegacorona J88 | 15.738 |

Table S4. Continuous Shape Measurement Calculations (CShM) of the first coordination sphere of NdIII in 2Nd, referring to all standard 10 vertices of the polyhedron. The lowest CShM value is highlighted in bold.

| Structure [ML10] | 2Nd |
| --- | --- |
| Decagon | 37.003 |
| Enneagonal pyramid | 25.561 |
| Octagonal bipyramid | 15.568 |
| Pentagonal prism | 11.442 |
| Pentagonal antiprism | 11.297 |
| Bicapped cube J15 | 8.744 |
| Bicapped square antiprism J17 | 4.034 |
| Metabidiminished icosahedron J62 | 6.779 |
| Augmented tridiminished icosahedron J64 | 19.388 |
| Sphenocorona J87 | 2.399 |
| Staggered Dodecahedron (2:6:2) | 2.377 |
| Tetradecahedron (2:6:2) | **1.811** |
| Hexadecahedron (2:6:2) or (1:4:4:1) | 6.336 |

Table S5. Continuous Shape Measurement Calculations (CShM) of the first coordination sphere of NdIII in 6Nd, referring to all standard 10 vertices of the polyhedron. The lowest CShM value is highlighted in bold.

| Structure [ML10] | 6Nd |
| --- | --- |
| Decagon | 35.575 |
| Enneagonal pyramid | 24.416 |
| Octagonal bipyramid | 16.480 |
| Pentagonal prism | 11.305 |
| Pentagonal antiprism | 11.022 |
| Bicapped cube J15 | 9.261 |
| Bicapped square antiprism J17 | 4.248 |
| Metabidiminished icosahedron J62 | 6.350 |
| Augmented tridiminished icosahedron J64 | 18.968 |
| Sphenocorona J87 | 2.607 |
| Staggered Dodecahedron (2:6:2) | 2.079 |
| Tetradecahedron (2:6:2) | **1.470** |
| Hexadecahedron (2:6:2) or (1:4:4:1) | 6.766 |

## 2.2. Other characterizations


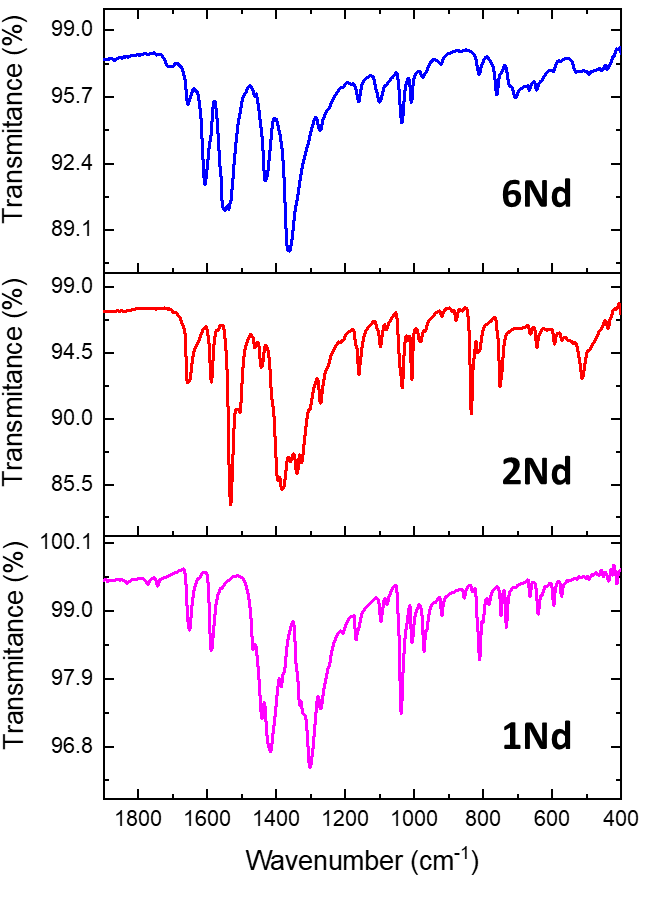


Figure S3. FTIR spectra of the NdIII complexes **1Nd**, **2Nd,** and **6Nd**.


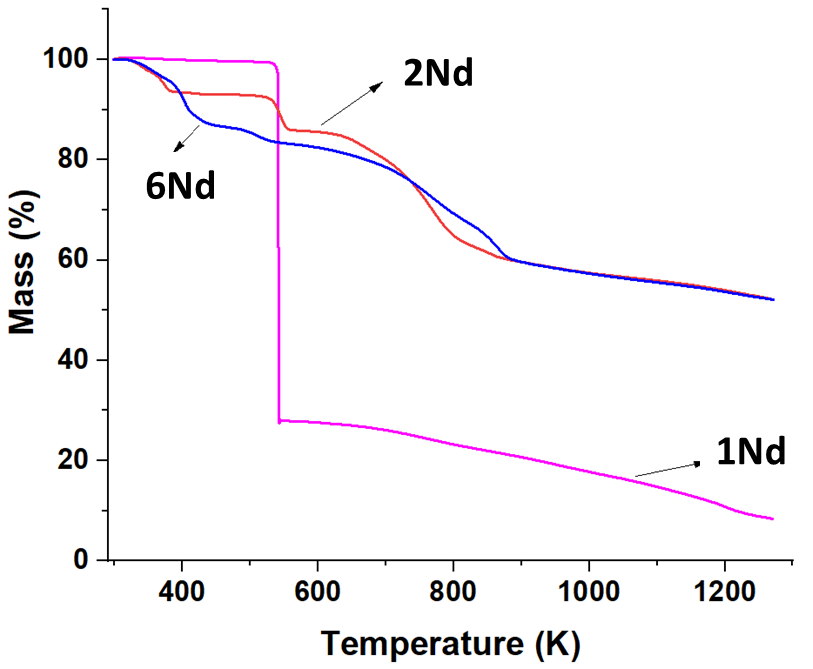


Figure S4. Thermograms of the NdIII complexes **1Nd**, **2Nd**, and **6Nd**.


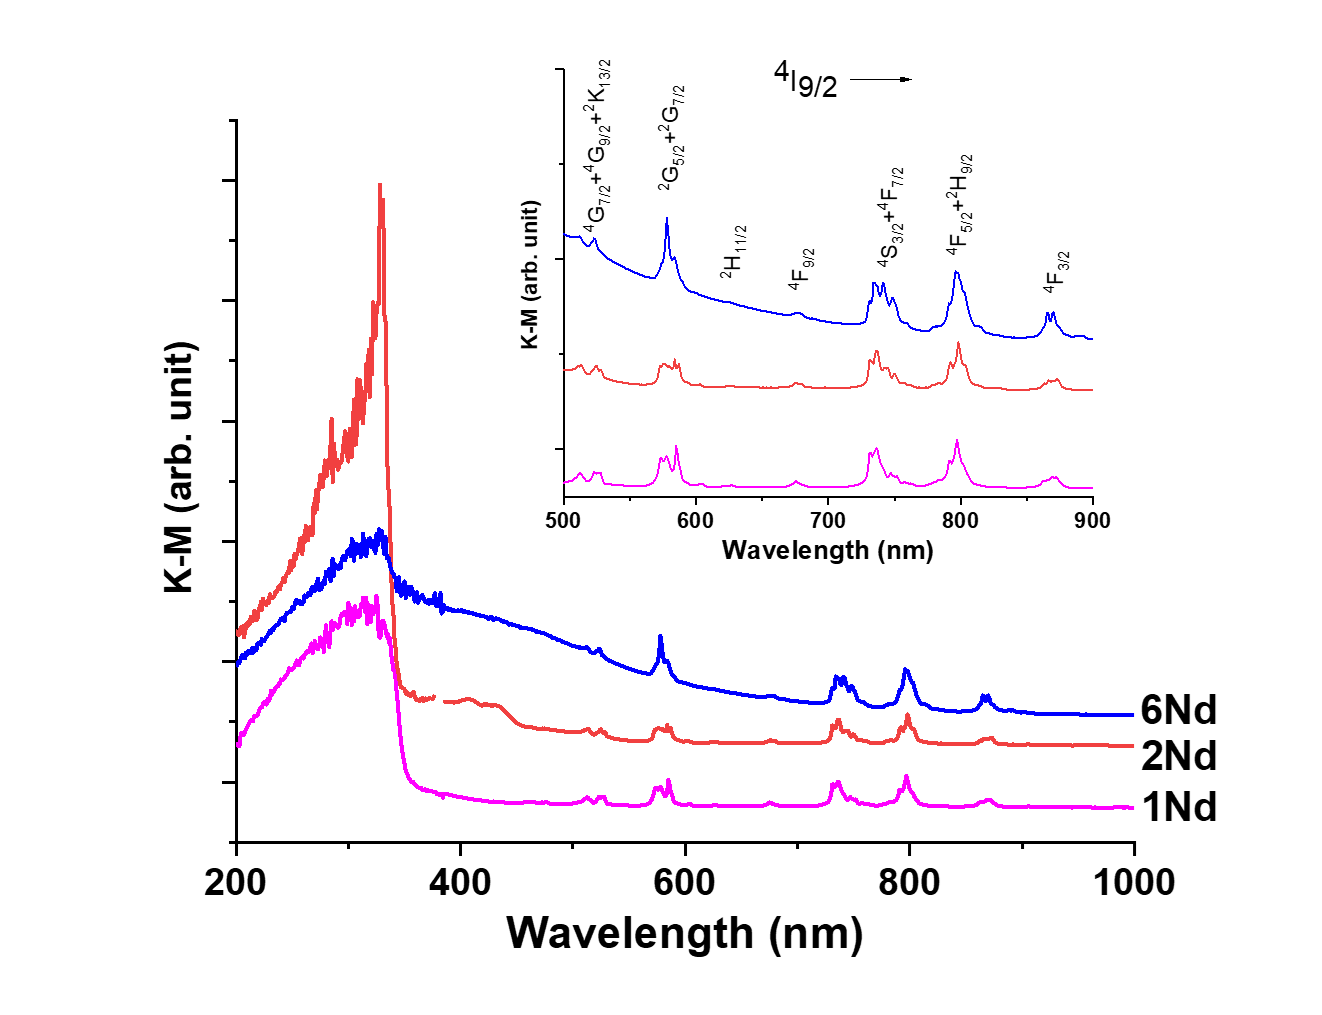


Figure S5. Kubelka-Munk plot for **1Nd**, **2Nd**, and **6Nd** (stacked for clarity of the signals). The principal peaks corresponding to the absorption of the metal centre are shown in the inset.

Table S6. Assign of the transitions observed in absorption spectra.

| Wavelength (nm) | Transition |
| --- | --- |
| 510 – 523 | 4I9/2 → 4G7/2 + 4G9/2 + 2K13/2 |
| 578 | 4I9/2 → 4G5/2 + 2G7/2 |
| 623 | 4I9/2 → 2H11/2 |
| 676 | 4I9/2 → 4F9/2 |
| 732 – 738 | 4I9/2 → 4S3/2 + 4F7/2 |
| 795-808 | 4I9/2 → 4F5/2 + 2H9/2 |
| 866 | 4I9/2 → 4F3/2 |

# 3. THERMOMETRIC PROPERTIES

**
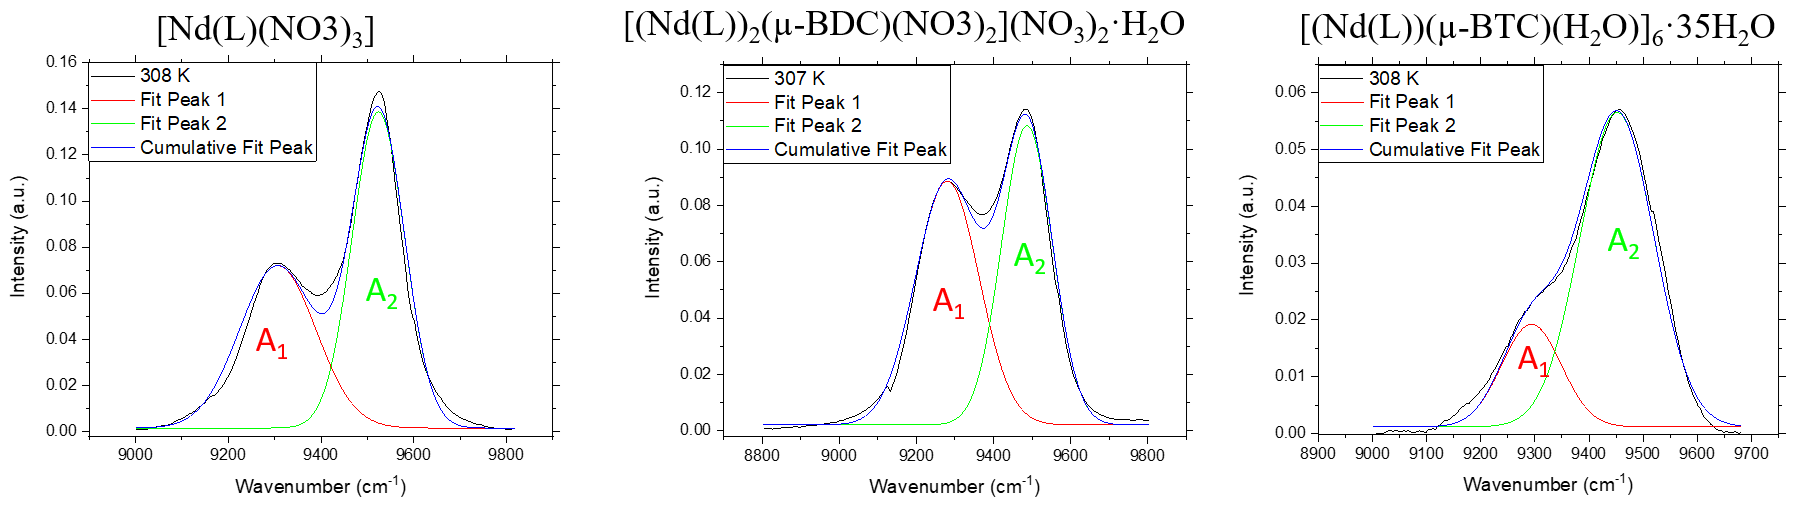
**

Figure S6. Representative deconvoluted plots for **1Nd** (left), **2Nd** (center), and for **6Nd** (right).

Table S7. Fitted parameters and agreements factors of deconvolutions spectra for 1Nd.

| Multiple peaks fitting using a Gaussian-type function: | | | | | | | | |
| --- | --- | --- | --- | --- | --- | --- | --- | --- |
|  | Peak 1 ( = 9306.6 cm−1) | | | Peak 2 ( = 9523.8 cm−1) | | | goodness of fit | |
| **T (K)** | (×10−3) |  |  | (×10−3) |  |  | **χ2**  (×10−5) | **R2** |
| 293 | 1.6 ± 0.6 | 159 ± 3 | 13.9 ± 0.3 | 1.6 ± 0.6 | 113 ± 1 | 19.2 ± 0.2 | 2.1 | 0.988 |
| 297 | 1.5 ± 0.6 | 161 ± 3 | 14.0 ± 0.3 | 1.5 ± 0.6 | 112 ± 1 | 19.0 ± 0.2 | 2.1 | 0.987 |
| 302 | 1.2 ± 0.6 | 165 ± 3 | 14.5 ± 0.3 | 1.2 ± 0.6 | 112 ± 1 | 19.3 ± 0.2 | 2.0 | 0.988 |
| 307 | 1.5 ± 0.6 | 165 ± 3 | 14.6 ± 0.3 | 1.5 ± 0.6 | 113 ± 1 | 19.4 ± 0.2 | 2.1 | 0.988 |
| 312 | 0.8 ± 0.6 | 168 ± 3 | 15.3 ± 0.3 | 0.8 ± 0.6 | 113 ± 1 | 19.8 ± 0.2 | 2.4 | 0.987 |
| 317 | 1.4 ± 0.6 | 169 ± 3 | 15.7 ± 0.3 | 1.4 ± 0.6 | 114 ± 1 | 20.4 ± 0.2 | 2.5 | 0.987 |
| 322 | 1.3 ± 0.6 | 169 ± 3 | 15.9 ± 0.3 | 1.3 ± 0.6 | 115 ± 1 | 20.5 ± 0.2 | 2.5 | 0.987 |
| 327 | 1.6 ± 0.6 | 170 ± 3 | 16.1 ± 0.3 | 1.6 ± 0.6 | 115 ± 1 | 20.8 ± 0.2 | 2.6 | 0.987 |
| 332 | 0.7 ± 0.7 | 171 ± 3 | 16.4 ± 0.3 | 0.7 ± 0.7 | 116 ± 1 | 21.0 ± 0.2 | 2.7 | 0.986 |

Table S8. Fitted parameters and agreements factors of deconvolutions spectra for 2Nd.

| Multiple peaks fitting using a Gaussian-type function: | | | | | | | | |
| --- | --- | --- | --- | --- | --- | --- | --- | --- |
|  | Peak 1 ( = 9280.0 cm−1) | | | Peak 2 ( = 9487.0 cm−1) | | | goodness of fit | |
| **T (K)** | (×10−3) |  |  | (×10−3) |  |  | **χ2**  (×10−5) | **R2** |
| 293 | 1.5 ± 0.3 | 163 ± 2 | 15.9 ± 0.2 | 1.5 ± 0.3 | 130 ± 1 | 16.4 ± 0.2 | 0.48 | 0.996 |
| 297 | 1.9 ± 0.3 | 164 ± 2 | 16.6 ± 0.2 | 1.9 ± 0.3 | 130 ± 1 | 16.8 ± 0.2 | 0.54 | 0.996 |
| 302 | 2.1 ± 0.3 | 164 ± 2 | 17.2 ± 0.2 | 2.1 ± 0.3 | 131 ± 1 | 17.2 ± 0.2 | 0.56 | 0.996 |
| 307 | 2.1 ± 0.3 | 165 ± 2 | 17.9 ± 0.2 | 2.1 ± 0.3 | 132 ± 1 | 17.6 ± 0.2 | 0.64 | 0.996 |
| 312 | 2.0 ± 0.3 | 166 ± 2 | 18.3 ± 0.2 | 2.0 ± 0.4 | 132 ± 1 | 17.7 ± 0.2 | 0.69 | 0.996 |
| 317 | 2.2 ± 0.3 | 166 ± 2 | 18.8 ± 0.2 | 2.2 ± 0.4 | 133 ± 2 | 18.0 ± 0.2 | 0.77 | 0.995 |
| 322 | 2.2 ± 0.4 | 167 ± 2 | 19.2 ± 0.2 | 2.2 ± 0.4 | 134 ± 2 | 18.1 ± 0.2 | 0.79 | 0.995 |
| 327 | 2.2 ± 0.4 | 168 ± 2 | 19.5 ± 0.2 | 2.2 ± 0.4 | 135 ± 2 | 18.1 ± 0.2 | 0.84 | 0.995 |
| 332 | 2.3 ± 0.4 | 168 ± 2 | 19.5 ± 0.2 | 2.3 ± 0.4 | 136 ± 2 | 18.1 ± 0.2 | 0.83 | 0.995 |

Table S9. Fitted parameters and agreements factors of deconvolutions spectra for 6Nd.

| Multiple peaks fitting using a Gaussian-type function: | | | | | | | | |
| --- | --- | --- | --- | --- | --- | --- | --- | --- |
|  | Peak 1 ( = 9293.7 cm−1) | | | Peak 2 ( = 9451.8 cm−1) | | | goodness of fit | |
| **T (K)** | (×10−3) |  |  | (×10−3) |  |  | **χ2**  (×10−5) | **R2** |
| 293 | 0.8 ± 0.3 | 96 ± 6 | 1.5 ± 0.1 | 0.8 ± 0.3 | 138 ± 2 | 8.6 ± 0.1 | 0.30 | 0.990 |
| 297 | 1.3 ± 0.2 | 103 ± 4 | 2.0 ± 0.1 | 1.3 ± 0.2 | 135 ± 2 | 8.9 ± 0.1 | 0.28 | 0.991 |
| 302 | 1.2 ± 0.2 | 108 ± 4 | 2.3 ± 0.1 | 1.2 ± 0.2 | 136 ± 1 | 9.3 ± 0.1 | 0.27 | 0.992 |
| 307 | 1.2 ± 0.2 | 110 ± 3 | 2.5 ± 0.1 | 1.2 ± 0.2 | 136 ± 1 | 9.4 ± 0.1 | 0.26 | 0.993 |
| 312 | 1.2 ± 0.2 | 113 ± 3 | 2.8 ± 0.1 | 1.2 ± 0.2 | 136 ± 1 | 9.7 ± 0.1 | 0.23 | 0.994 |
| 317 | 1.1 ± 0.2 | 117 ± 3 | 3.1 ± 0.1 | 1.1 ± 0.2 | 136 ± 1 | 10.0 ± 0.1 | 0.23 | 0.994 |
| 322 | 1.4 ± 0.2 | 120 ± 3 | 3.4 ± 0.1 | 1.4 ± 0.2 | 136 ± 1 | 10.3 ± 0.1 | 0.22 | 0.995 |
| 327 | 1.4 ± 0.2 | 124 ± 2 | 3.8 ± 0.1 | 1.4 ± 0.2 | 137 ± 1 | 10.8 ± 0.1 | 0.21 | 0.995 |
| 332 | 1.5 ± 0.2 | 127 ± 2 | 4.1 ± 0.1 | 1.5 ± 0.2 | 137 ± 1 | 11.0 ± 0.1 | 0.21 | 0.996 |

Table S10. LIR data, fitted parameters and goodness of linear fit for 6Nd.

| Temp. (K) | A1 (area) | A2 (area) | A1/A2 | Linear Fit | Sr |
| --- | --- | --- | --- | --- | --- |
| 293 | 1.5 | 8.6 | 0.18 | 0.20 | 2.4 |
| 297 | 2.0 | 8.9 | 0.22 | 0.21 | 2.2 |
| 302 | 2.3 | 9.3 | 0.25 | 0.24 | 2.0 |
| 307 | 2.5 | 9.4 | 0.26 | 0.26 | 1.8 |
| 312 | 2.8 | 9.7 | 0.29 | 0.28 | 1.6 |
| 317 | 3.1 | 10.0 | 0.31 | 0.31 | 1.5 |
| 322 | 3.4 | 10.3 | 0.33 | 0.33 | 1.4 |
| 327 | 3.8 | 10.8 | 0.35 | 0.35 | 1.3 |
| 332 | 4.1 | 11.0 | 0.37 | 0.38 | 1.2 |
| Linear function y = a + b*x | | | | | |
| a | b | **χ2**  (×10−4) | **R2** |  |  |
| -1.16 ± 0.07 | 0.0046 ± 2.4E-4 | 5.8 | 0.991 |  |  |

.


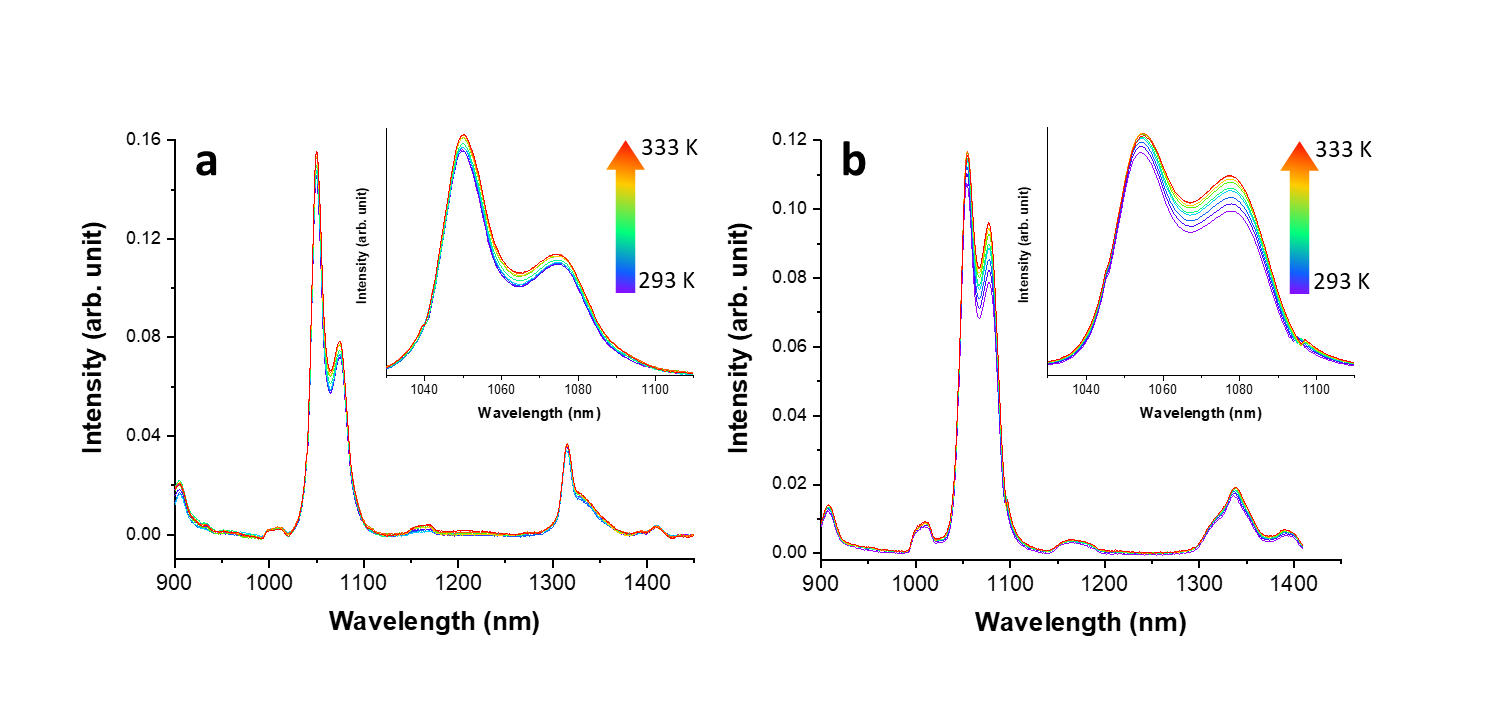


Figure S7. Temperature dependent emission spectra of a) the mononuclear complex [Nd(L)(NO3)3] (**1Nd**), and b) the dinuclear complex [(Nd(L))2(µ-BDC)(NO3)2](NO3)2·H2O (**2Nd**).


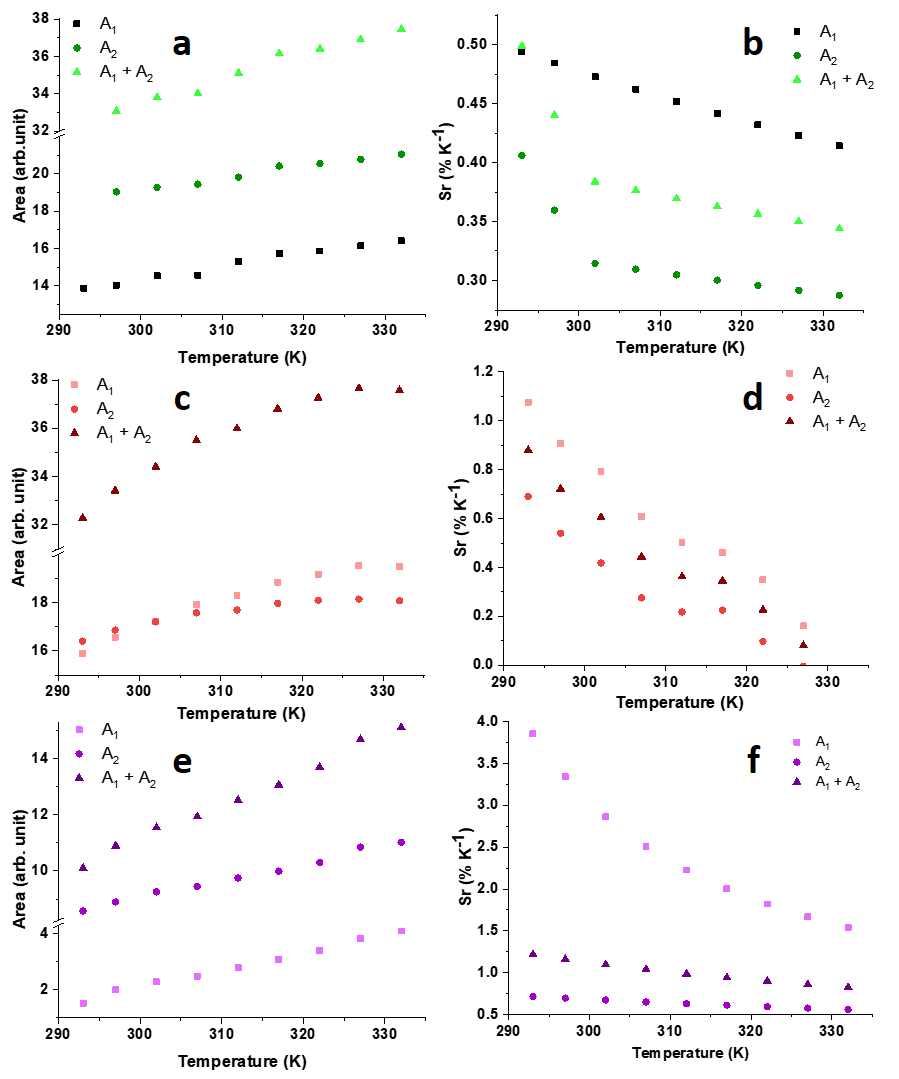


Figure S8. Temperature dependence of the area of the two components of the 4F3/2→4I11/2 transition for a) **1Nd**, c) **2Nd**, and for e) **6Nd**, as well as their respective relative sensitivities (b, d, and f).

# 4. THEORETICAL CALCULATIONS


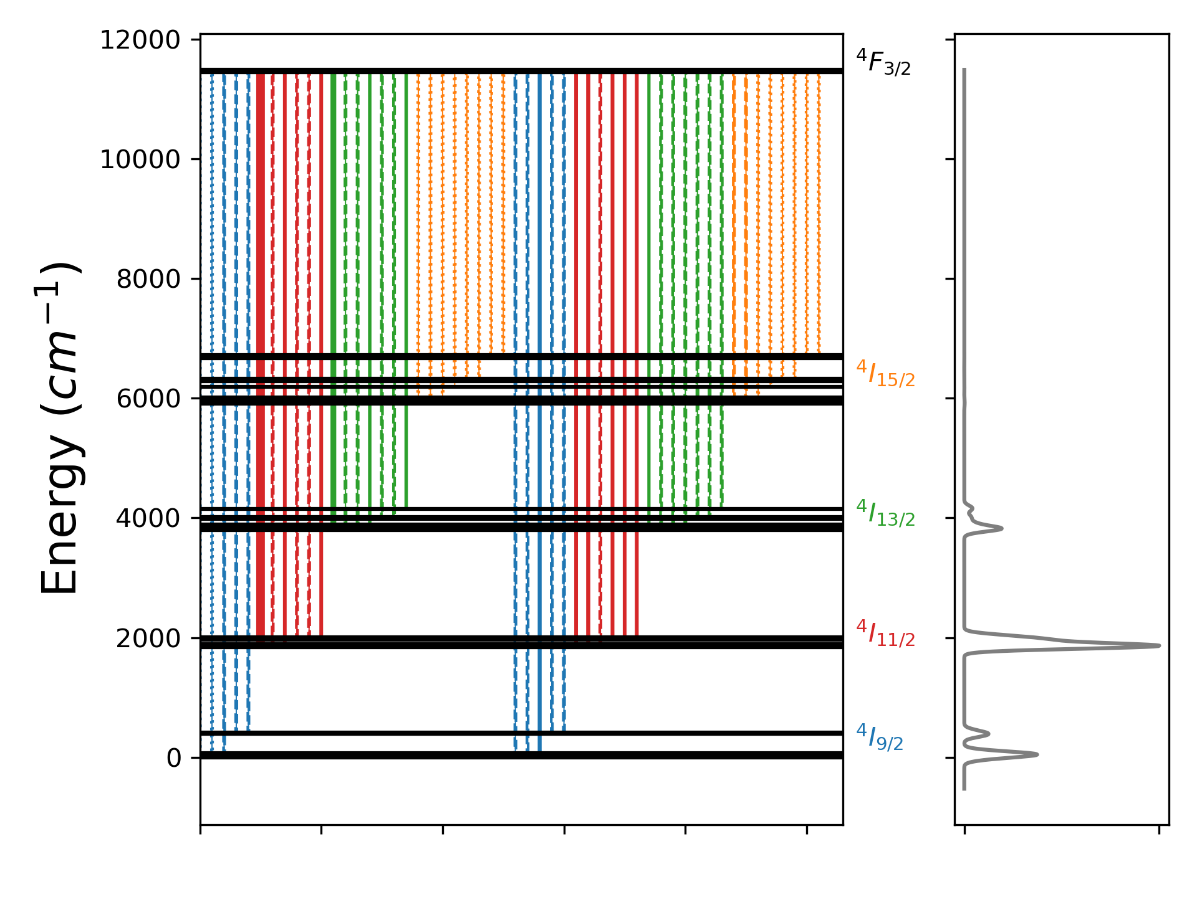


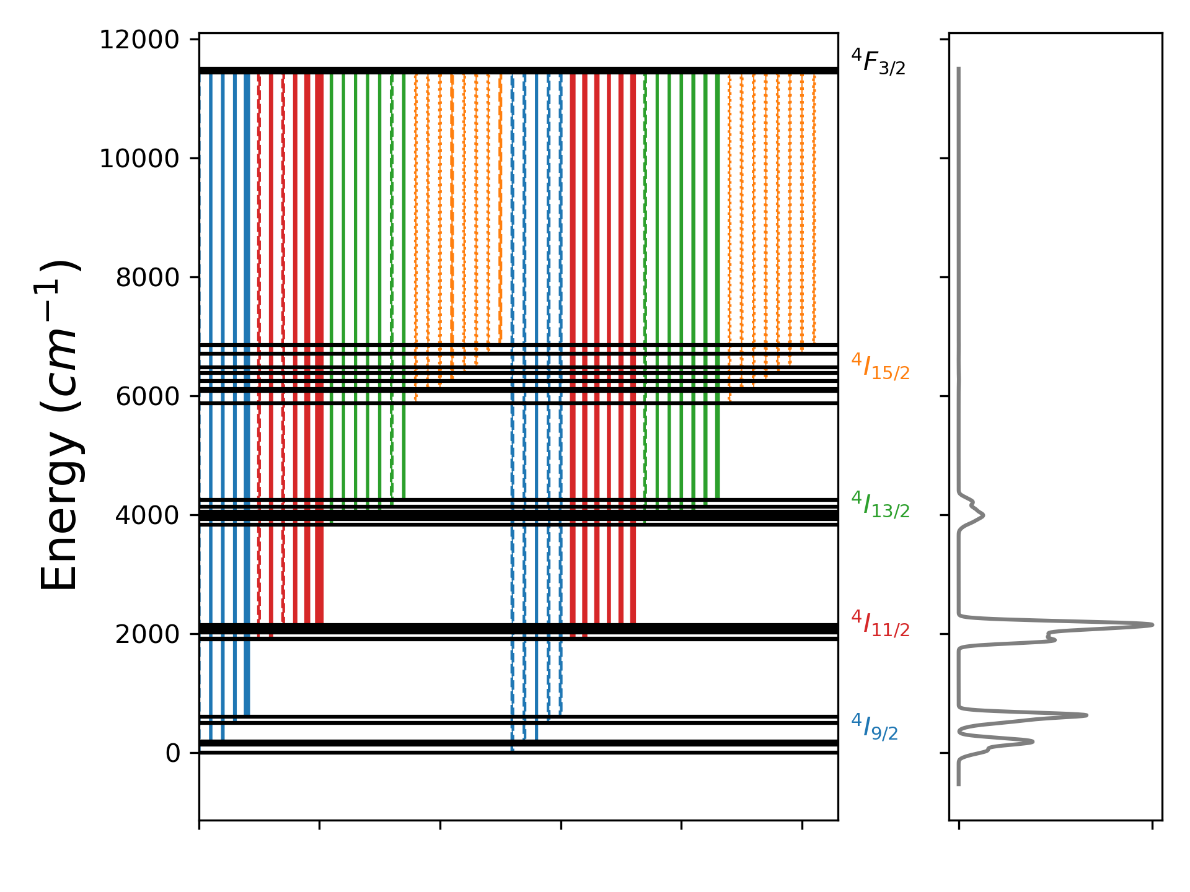


Figure S9. Dieke diagram for **1Nd (top)** and **2Nd (bottom)**. The width of the of the vertical lines are proportional to the oscillator strength (fosc) of the transition while dashed and point-dash lines indicate smaller fosc values (by one or two orders of magnitude relative to the maximum fosc, respectively). The calculated emission spectrum is presented in the right plot.


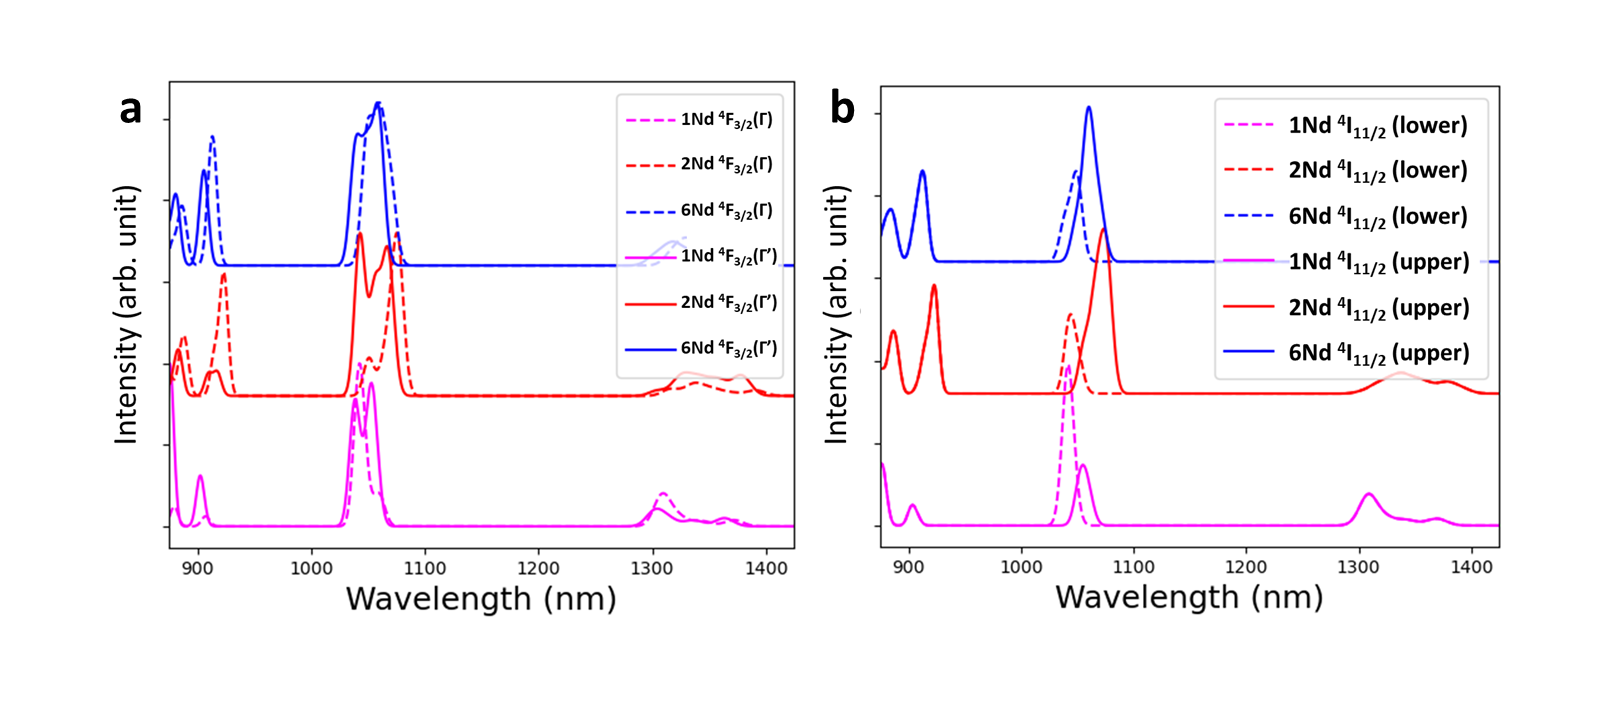


Figure S10. CASSCF(3,12) calculated emission spectrum of **1Nd**, **2Nd**, and **6Nd** decomposed in the contributions of both Kramers’ doublets of a) 4F3/2 (Γ and Γ’) and b) from the 4I11/2 multiplet (lower and upper levels).

The emission intensity from a state to can be described by the product of the population () and the radiative rate () of the emitting level:

|  | (S1) |
| --- | --- |

where

|  | (S2) |
| --- | --- |

where is the reduced Planck’s constant, is the degeneracy of the emitting level , is the wavenumber of the transition (in cm−1), and is the refractive index of the medium. The quantities and are the electric and magnetic dipole strengths of the transition, respectively. These quantities can be estimated from the following equations:

|  | (S3) |
| --- | --- |
|  | (S4) |

where is the Bohr magneton ( is the electron mass and the speed of light), The matrix elements values and are tabulated in references [5] and [6], respectively.

According to selection rules, the transition 4F3/2→4I11/2 has [6]. Therefore, the magnetic dipole contribution can be ignored.

In this sense, the luminescence intensity ratio (LIR) between two Stark transitions from the 4F3/2 can be described as:

|  | (S5) |
| --- | --- |

where the thermal-dependent term is contained in the ratio , which can be described by a Boltzmann distribution between Stark levels separations ( in Figure S9) of the 4F3/2 level:

|  | (S6) |
| --- | --- |

Here, is the Boltzmann constant, is the temperature, and represents the energy separation between Stark levels. Thus, the thermometric behavior can be derived by assuming that the dipole strength and the energy of the transition remain unaffected by the temperature changes.

The relative sensitivity () can be calculated as:

|  | (S7) |
| --- | --- |

# REFERENCES

[1] P. Fuentealba, D. Villagra, Y. Gil, H. Aguilar‐Bolados, R. Costa de Santana, G. Gasparotto, A. Vega, J. Manzur, E. Spodine, Eur. J. Inorg. Chem. 2021, 2021, 4543–4551.

[2] Y. Gil, R. C. de Santana, A. S. S. de Camargo, L. G. Merízio, P. F. Carreño, P. Fuentealba, J. Manzur, E. Spodine, Dalt. Trans. 2023, 52, 3158–3168.

[3] Y. Gil, P. Fuentealba, A. Vega, E. Spodine, D. Aravena, Dalt. Trans. 2020, 49, 17709–17718.

[4] D. S. Kumar, V. Alexander, Inorganica Chim. Acta 1995, 238, 63–71.

[5] W. T. Carnall, H. Crosswhite, H. M. Crosswhite, Energy Level Structure and Transition Probabilities in the Spectra of the Trivalent Lanthanides in LaF₃, Argonne, IL, United States, 1978.

[6] M. Oggianu, V. Mameli, M. A. Hernández-Rodríguez, N. Monni, M. Souto, C. D. S. Brites, C. Cannas, F. Manna, F. Quochi, E. Cadoni, N. Masciocchi, A. N. Carneiro Neto, L. D. Carlos, M. L. Mercuri, Chem. Mater. 2024, 36, 3452–3463.
