# Supplementary material for: Anti-Thermal Quenching in NdIII Molecular Near-Infrared Thermometers Operating at Physiological Temperatures
Source: Research Square preprint supplement (doi:10.21203/rs.3.rs-5795718/v1), 2025-01-15
Supplement: Supplementary file 3 [file 8e15cea06a13583461f257b3.pdf]

## checkCIF/PLATON report

Structure factors have been supplied for datablock(s) SCD23\_110\_R-3\_sq

THIS REPORT IS FOR GUIDANCE ONLY. IF USED AS PART OF A REVIEW PROCEDURE FOR PUBLICATION, IT SHOULD NOT REPLACE THE EXPERTISE OF AN EXPERIENCED CRYSTALLOGRAPHIC REFEREE.

No syntax errors found.      CIF dictionary      Interpreting this report

### Datablock: SCD23\_110\_R-3\_sq

---

Bond precision:    C-C = 0.0122 A                      Wavelength=0.71073

Cell:                      a=31.8437(6)              b=31.8437(6)              c=19.8704(9)  
                                    alpha=90                      beta=90                      gamma=120

Temperature:              296 K

|                        | Calculated                           | Reported                             |
|------------------------|--------------------------------------|--------------------------------------|
| Volume                 | 17449.6(10)                          | 17449.5(10)                          |
| Space group            | R -3                                 | R -3 :H                              |
| Hall group             | -R 3                                 | -R 3                                 |
| Moiety formula         | C162 H138 N36 Nd6 O42 [+<br>solvent] | C162 H138 N36 Nd6 O42 [+<br>solvent] |
| Sum formula            | C162 H138 N36 Nd6 O42 [+<br>solvent] | C162 H138 N36 Nd6 O42 [+<br>solvent] |
| Mr                     | 4126.53                              | 4126.53                              |
| Dx, g cm <sup>-3</sup> | 1.178                                | 1.178                                |
| Z                      | 3                                    | 3                                    |
| Mu (mm <sup>-1</sup> ) | 1.379                                | 1.379                                |
| F000                   | 6174.0                               | 6174.0                               |
| F000'                  | 6172.92                              |                                      |
| h, k, lmax             | 39, 39, 24                           | 39, 39, 24                           |
| Nref                   | 7616                                 | 5911                                 |
| Tmin, Tmax             | 0.743, 0.876                         | 0.372, 0.499                         |
| Tmin'                  | 0.728                                |                                      |

Correction method= # Reported T Limits: Tmin=0.372 Tmax=0.499  
AbsCorr = EMPIRICAL

Data completeness= 0.776

Theta(max)= 25.992

R(reflections)= 0.0390( 4852)

wR2(reflections)=  
0.1107( 5911)

S = 1.091

Npar= 378

The following ALERTS were generated. Each ALERT has the format

**test-name\_ALERT\_alert-type\_alert-level.**

Click on the hyperlinks for more details of the test.

---

**Alert level B**

PLAT911\_ALERT\_3\_B Missing FCF Refl Between Thmin & STh/L= 0.600 1645 Report

---

**Alert level C**

PLAT220\_ALERT\_2\_C NonSolvent Resd 1 C Ueq(max)/Ueq(min) Range 4.9 Ratio  
PLAT220\_ALERT\_2\_C NonSolvent Resd 1 O Ueq(max)/Ueq(min) Range 3.7 Ratio  
PLAT222\_ALERT\_3\_C NonSolvent Resd 1 H Uiso(max)/Uiso(min) Range 10.0 Ratio  
PLAT234\_ALERT\_4\_C Large Hirshfeld Difference C2 --C3 . 0.23 Ang.  
PLAT234\_ALERT\_4\_C Large Hirshfeld Difference C3 --C4 . 0.20 Ang.  
PLAT241\_ALERT\_2\_C High 'MainMol' Ueq as Compared to Neighbors of 02 Check  
PLAT241\_ALERT\_2\_C High 'MainMol' Ueq as Compared to Neighbors of C3 Check  
PLAT242\_ALERT\_2\_C Low 'MainMol' Ueq as Compared to Neighbors of Nd1 Check  
PLAT242\_ALERT\_2\_C Low 'MainMol' Ueq as Compared to Neighbors of C26 Check  
PLAT314\_ALERT\_2\_C Small Angle for H2O: Metal-O7 -H8W . 83.32 Degree  
PLAT342\_ALERT\_3\_C Low Bond Precision on C-C Bonds ..... 0.01222 Ang.  
PLAT369\_ALERT\_2\_C Long C(sp2)-C(sp2) Bond C22 - C26 . 1.53 Ang.  
PLAT905\_ALERT\_3\_C Negative K value in the Analysis of Variance ... -3.173 Report  
PLAT976\_ALERT\_2\_C Check Calcd Resid. Dens. 0.95Ang From O7 . -0.67 eA-3

---

**Alert level G**

CELLZ01\_ALERT\_1\_G Difference between formula and atom\_site contents detected.

CELLZ01\_ALERT\_1\_G ALERT: Large difference may be due to a

symmetry error - see SYMMG tests

From the CIF: \_cell\_formula\_units\_Z 3

From the CIF: \_chemical\_formula\_sum C162 H138 N36 Nd6 O42 [+ solvent]

TEST: Compare cell contents of formula and atom\_site data

| atom  | Z*formula | cif sites | diff |
|-------|-----------|-----------|------|
| C     | 486.00    | 486.00    | 0.00 |
| H     | 414.00    | 414.00    | 0.00 |
| N     | 108.00    | 108.00    | 0.00 |
| Nd    | 18.00     | 18.00     | 0.00 |
| O     | 126.00    | 126.00    | 0.00 |
| [+    | 3.00      | 0.00      | 3.00 |
| solve | 3.00      | 0.00      | 3.00 |

PLAT002\_ALERT\_2\_G Number of Distance or Angle Restraints on AtSite 3 Note  
PLAT019\_ALERT\_1\_G \_diffrn\_measured\_fraction\_theta\_full/\*\_max < 1.0 0.987 Report  
PLAT083\_ALERT\_2\_G SHELXL Second Parameter in WGHT Unusually Large 132.28 Why ?  
PLAT172\_ALERT\_4\_G The CIF-Embedded .res File Contains DFIX Records 1 Report  
PLAT232\_ALERT\_2\_G Hirshfeld Test Diff (M-X) Nd1 --O2 . 6.0 s.u.  
PLAT432\_ALERT\_2\_G Short Inter X...Y Contact C27 ..C27 . 3.15 Ang.  
5/3-x,1/3-y,4/3-z = 13\_656 Check  
PLAT606\_ALERT\_4\_G Solvent Accessible VOID(S) in Structure ..... ! Info  
PLAT794\_ALERT\_5\_G Tentative Bond Valency for Nd1 (III) . 3.65 Info

|                   |                                                  |      |              |
|-------------------|--------------------------------------------------|------|--------------|
| PLAT860_ALERT_3_G | Number of Least-Squares Restraints .....         | 2    | Note         |
| PLAT869_ALERT_4_G | ALERTS Related to the Use of SQUEEZE Suppressed  | !    | Info         |
| PLAT912_ALERT_4_G | Missing # of FCF Reflections Above STh/L= 0.600  | 60   | Note         |
| PLAT933_ALERT_2_G | Number of HKL-OMIT Records in Embedded .res File | 13   | Note         |
| PLAT941_ALERT_3_G | Average HKL Measurement Multiplicity .....       | 3.5  | Low          |
| PLAT965_ALERT_2_G | The SHELXL WEIGHT Optimisation has not Converged |      | Please Check |
| PLAT967_ALERT_5_G | Note: Two-Theta Cutoff Value in Embedded .res .. | 52.0 | Degree       |
| PLAT978_ALERT_2_G | Number C-C Bonds with Positive Residual Density. | 1    | Info         |

---

0 **ALERT level A** = Most likely a serious problem - resolve or explain  
1 **ALERT level B** = A potentially serious problem, consider carefully  
14 **ALERT level C** = Check. Ensure it is not caused by an omission or oversight  
18 **ALERT level G** = General information/check it is not something unexpected

3 ALERT type 1 CIF construction/syntax error, inconsistent or missing data  
16 ALERT type 2 Indicator that the structure model may be wrong or deficient  
6 ALERT type 3 Indicator that the structure quality may be low  
6 ALERT type 4 Improvement, methodology, query or suggestion  
2 ALERT type 5 Informative message, check

---

It is advisable to attempt to resolve as many as possible of the alerts in all categories. Often the minor alerts point to easily fixed oversights, errors and omissions in your CIF or refinement strategy, so attention to these fine details can be worthwhile. In order to resolve some of the more serious problems it may be necessary to carry out additional measurements or structure refinements. However, the purpose of your study may justify the reported deviations and the more serious of these should normally be commented upon in the discussion or experimental section of a paper or in the "special\_details" fields of the CIF. checkCIF was carefully designed to identify outliers and unusual parameters, but every test has its limitations and alerts that are not important in a particular case may appear. Conversely, the absence of alerts does not guarantee there are no aspects of the results needing attention. It is up to the individual to critically assess their own results and, if necessary, seek expert advice.

### Publication of your CIF in IUCr journals

A basic structural check has been run on your CIF. These basic checks will be run on all CIFs submitted for publication in IUCr journals (*Acta Crystallographica*, *Journal of Applied Crystallography*, *Journal of Synchrotron Radiation*); however, if you intend to submit to *Acta Crystallographica Section C* or *E* or *IUCrData*, you should make sure that full publication checks are run on the final version of your CIF prior to submission.

### Publication of your CIF in other journals

Please refer to the *Notes for Authors* of the relevant journal for any special instructions relating to CIF submission.
